# Supplementary material for: Virtual Screening and Hit Selection of Natural Compounds as Acetylcholinesterase Inhibitors
Source: Molecules. 2022 May 13;27(10):3139. doi: 10.3390/molecules27103139 (PMC9145144; doi:10.3390/molecules27103139)
Supplement: Supplementary file 1 [file molecules-27-03139-s001.zip › molecules-1592786-supplementary.pdf]

**Table S1.** Natural compounds selected as potential AChE inhibitors by docking-based virtual screening and ADME filtering. Blue lines separate the different structural groups. The chosen suitable complexes from MD simulations are denoted in bold. The galantamine derivatives are presented in italic (**10** and **11**).

| No        | ZINC ID             | ChemPLP        | Structure                                                                           | Size, Å      | Vendors    |
|-----------|---------------------|----------------|-------------------------------------------------------------------------------------|--------------|------------|
| <b>1</b>  | <b>ZINC30726889</b> | <b>70.08</b>   | 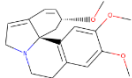   | <b>5.755</b> | <b>YES</b> |
| <b>2</b>  | <b>ZINC33955878</b> | <b>82.22</b>   | 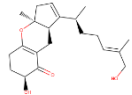   | <b>5.704</b> | <b>YES</b> |
| 3         | ZINC15514750        | 83.6908        | 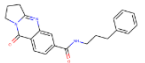   | 7.105        | YES        |
| 4         | ZINC12663453        | 81.385         | 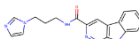   | 6.819        | YES        |
| <b>5*</b> | <b>ZINC00488892</b> | <b>85.05</b>   | 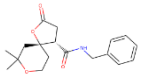 | <b>5.155</b> | <b>YES</b> |
| 6         | ZINC00489733        | 75.6852        | 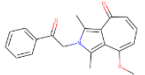 | 5.152        | YES        |
| <b>7</b>  | <b>ZINC02161293</b> | <b>72.8523</b> | 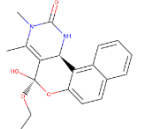 | <b>7.456</b> | <b>YES</b> |
| 8         | ZINC04028616        | 80.7558        | 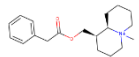 | 5.002        | YES        |
| <b>9*</b> | <b>ZINC12296402</b> | <b>85.9159</b> | 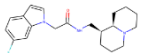 | <b>5.1</b>   | <b>YES</b> |
| 10        | <i>ZINC0402661</i>  | 80.3642        | 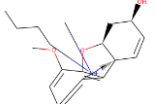 | 6.265        | YES        |

| No  | ZINC ID      | ChemPLP | Structure                                                                           | Size, Å | Vendors |
|-----|--------------|---------|-------------------------------------------------------------------------------------|---------|---------|
| 11  | ZINC96316410 | 71.611  | 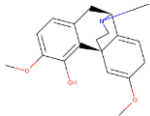   | 5.27    | YES     |
| 12  | ZINC04257807 | 73.9836 | 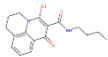   | 5.145   | YES     |
| 13  | ZINC19550899 | 75.1924 | 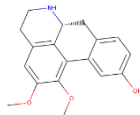   | 7.228   | YES     |
| 14  | ZINC19938823 | 77.898  | 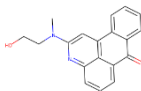   | 7.351   | YES     |
| 15  | ZINC04027315 | 73.6323 | 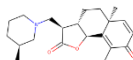  | 6.415   | YES     |
| 16* | ZINC62001364 | 76.7413 | 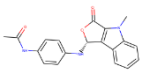 | 6.491   | YES     |
| 17* | ZINC22607229 | 82.7631 | 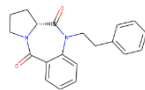 | 7.311   | YES     |
| 18* | ZINC08764534 | 79.0189 | 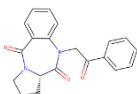 | 7.323   | YES     |
| 19  | ZINC12296326 | 75.4476 | 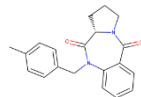 | 7.152   | YES     |
| 20  | ZINC04027662 | 73.493  | 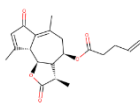 | 5.698   | YES     |
| 21* | ZINC38571093 | 82.7599 | 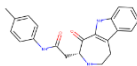 | 7.4     | YES     |

| No  | ZINC ID      | ChemPLP | Structure                                                                           | Size, Å | Vendors |
|-----|--------------|---------|-------------------------------------------------------------------------------------|---------|---------|
| 22* | ZINC06624539 | 84.6421 | 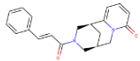   | 5.33    | YES     |
| 23  | ZINC08764503 | 75.9211 | 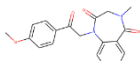   | 5.087   | YES     |
| 24  | ZINC12892572 | 80.7214 | 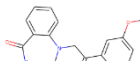   | 5.087   | YES     |
| 25* | ZINC12902266 | 77.6389 | 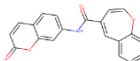   | 5.184   | YES     |
| 26  | ZINC66407652 | 72.9183 | 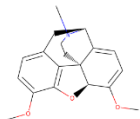  | 5.588   | YES     |
| 27  | ZINC12865585 | 71.3187 | 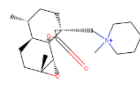 | 5.266   | YES     |
| 28* | ZINC35877799 | 73.5909 | 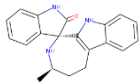 | 8.735   | YES     |
| 29* | ZINC20064218 | 77.5505 | 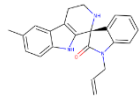 | 7.421   | YES     |
| 30  | ZINC36055840 | 72.3623 | 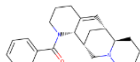 | 7.251   | YES     |
| 31  | ZINC20410852 | 74.5599 | 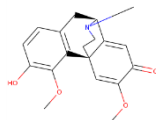 | 6.503   | YES     |
| 32  | ZINC96316346 | 76.3434 | 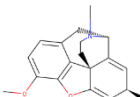 | 6.123   | YES     |

| No | ZINC ID      | ChemPLP | Structure                                                                         | Size, Å | Vendors |
|----|--------------|---------|-----------------------------------------------------------------------------------|---------|---------|
| 33 | ZINC96316411 | 78.0323 | 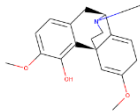 | 6.565   | YES     |
| 34 | ZINC14719345 | 73.2384 | 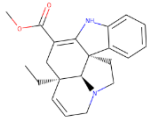 | 5.919   | YES     |

\* - selected compounds for testing

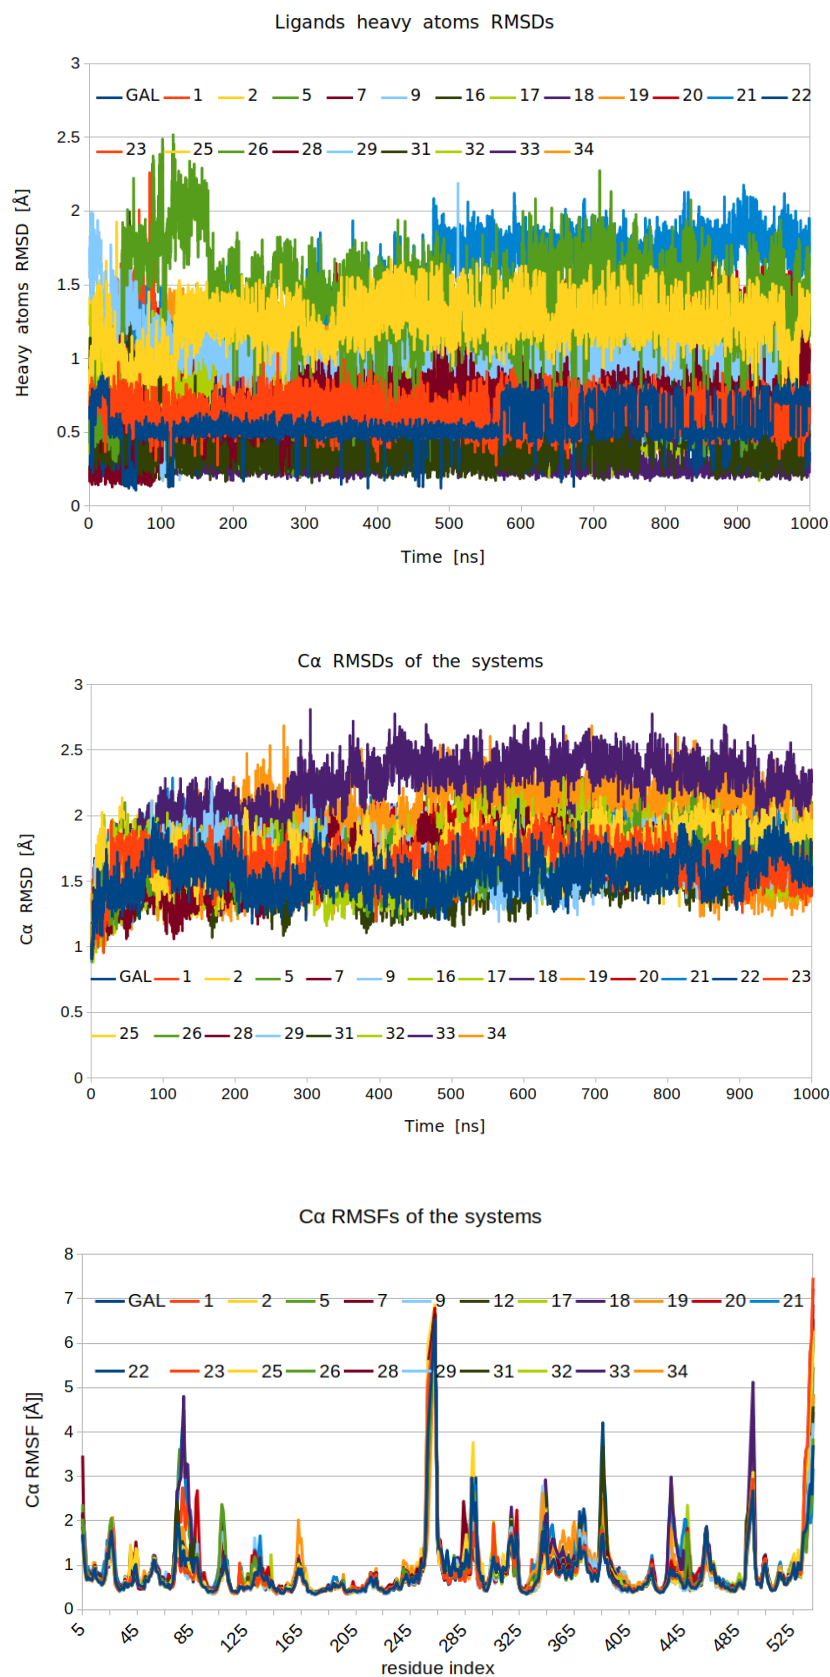

**Figure S1.** Ligands heavy atoms (up) and protein backbone C-atoms RMSDs (in the middle) and RMSFs (down) for AChE are shown.

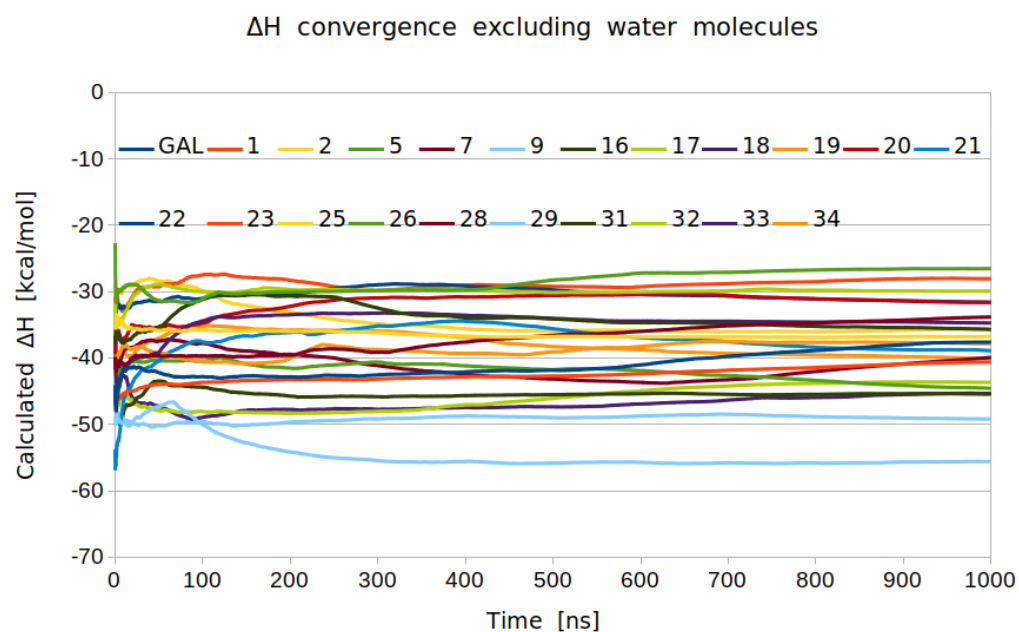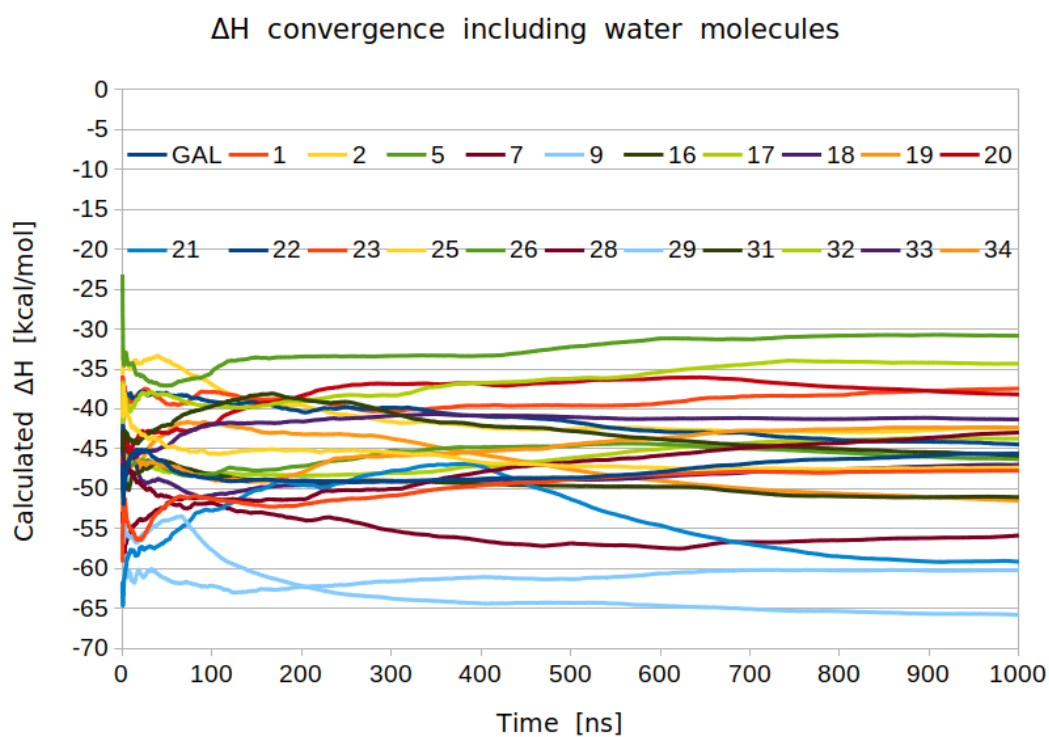

**Figure S2.** Convergence of enthalpies with excluded (up) and included (down) solvent interactions.

**Table S2.** A three-step procedure of molecule selection for anti-AChE screening. ChemPLP scores from docking, averaged enthalpies with included solvent interactions, and sum of both absolute values are shown. The selected compounds are given in bold.

| Compound  | ChemPLP score  | $\Delta H_{\text{solv, avrg}}$ , kcal/mol | ChemPLP+ $ \Delta H_{\text{solv, avrg}} $ | Price for 1mg, USD, InterBioScreen |
|-----------|----------------|-------------------------------------------|-------------------------------------------|------------------------------------|
| 1         | 70.08          | -47.7340                                  | 117.8140                                  | DV*                                |
| 2         | 82.22          | -47.3456                                  | 129.5656                                  | >100                               |
| <b>5</b>  | <b>85.05</b>   | <b>-30.8296</b>                           | <b>115.8796</b>                           | <b>&lt;100</b>                     |
| 7         | 72.8523        | -42.9445                                  | 115.7968                                  | <100                               |
| <b>9</b>  | <b>85.9159</b> | <b>-65.8063</b>                           | <b>151.7222</b>                           | <b>&lt;100</b>                     |
| <b>16</b> | <b>76.7413</b> | <b>-45.8669</b>                           | <b>122.6082</b>                           | <b>&lt;100</b>                     |
| <b>17</b> | <b>82.7631</b> | <b>-34.3182</b>                           | <b>117.0813</b>                           | <b>&lt;100</b>                     |
| <b>18</b> | <b>79.0189</b> | <b>-41.3130</b>                           | <b>120.3319</b>                           | <b>&lt;100</b>                     |
| 19        | 75.4476        | -42.3293                                  | 117.7769                                  | <100                               |
| 20        | 73.493         | -38.1824                                  | 111.6754                                  | <100                               |
| <b>21</b> | <b>82.7599</b> | <b>-59.1422</b>                           | <b>141.9021</b>                           | <b>&lt;100</b>                     |
| <b>22</b> | <b>84.6421</b> | <b>-44.4386</b>                           | <b>129.0807</b>                           | <b>&lt;100</b>                     |
| 23        | 75.9211        | -37.4531                                  | 113.3742                                  | <100                               |
| <b>25</b> | <b>77.6389</b> | <b>-42.3505</b>                           | <b>119.9894</b>                           | <b>&lt;100</b>                     |
| 26        | 72.9183        | -46.2868                                  | 119.2051                                  | DV*                                |
| <b>28</b> | <b>73.5909</b> | <b>-55.8388</b>                           | <b>129.4297</b>                           | <b>&lt;100</b>                     |
| <b>29</b> | <b>77.5505</b> | <b>-60.2032</b>                           | <b>137.7537</b>                           | <b>&lt;100</b>                     |
| 31        | 74.5599        | -51.0576                                  | 125.6175                                  | >100                               |
| 32        | 76.3434        | -43.7316                                  | 120.0750                                  | DV*                                |
| 33        | 78.0323        | -47.0020                                  | 125.0343                                  | DV*                                |
| 34        | 73.2384        | -51.4843                                  | 124.7227                                  | >100                               |
| GAL       |                |                                           |                                           |                                    |

\*DV – different vendor

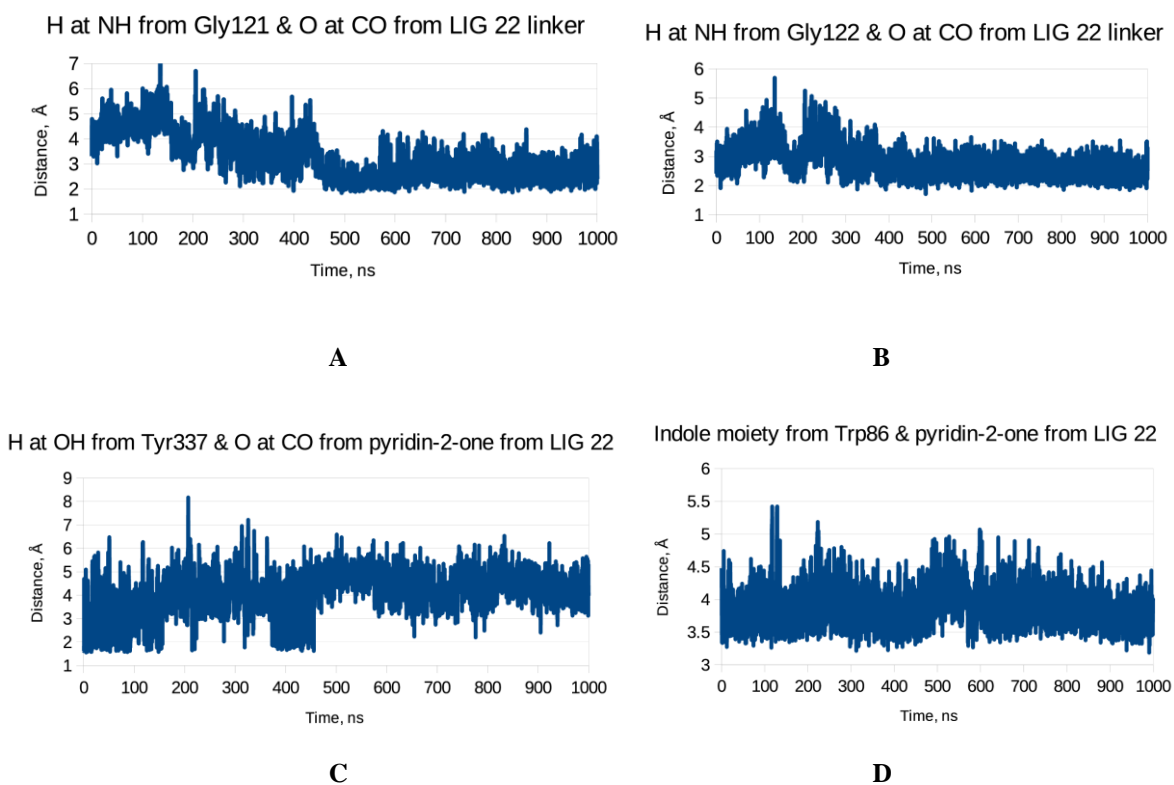

**Figure S3.** Distance plots over the course of simulation for compound **22**. A) between H atom at N-terminal from Gly121 and O atom at CO group from the linker; B) between H atom at N-terminal from Gly122 and O atom at CO group from the linker; C) between H atom at OH group from Tyr337 and O atom at CO group from pyridin-2-one ; D) between indole part of Trp86 and pyridin-2-one.

H at NH from Gly121 & N at indole ring from LIG 28

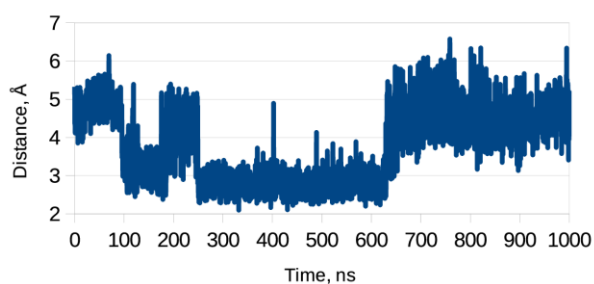

**A**

COO<sup>-</sup> from Glu202 & H at N at indole ring from LIG 28

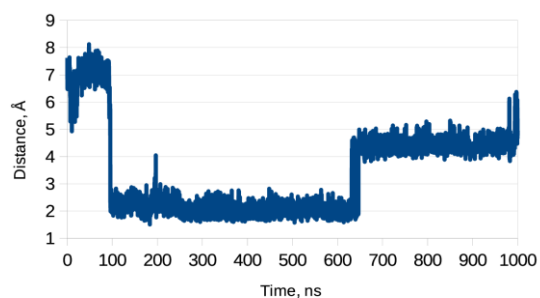

**B**

O at OH from Ser203 & H at N at indolinone part from LIG 28

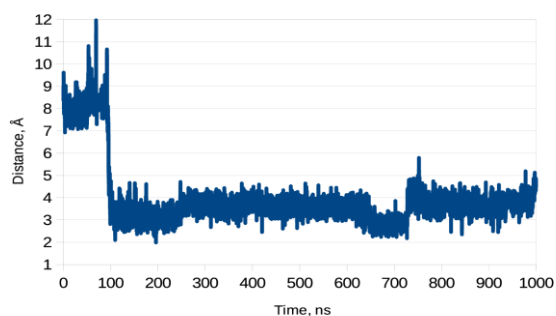

**C**

H at OH from Ser203 & O at CO at indolinone part from LIG 28

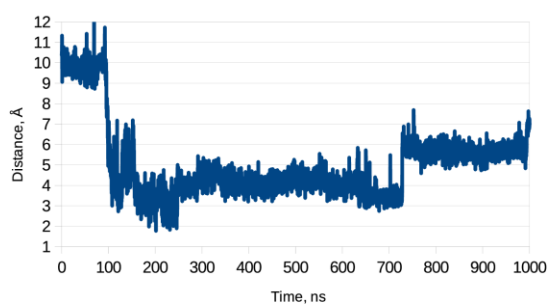

**D**

N at His447 & H1 at N4<sup>+</sup> from LIG 28

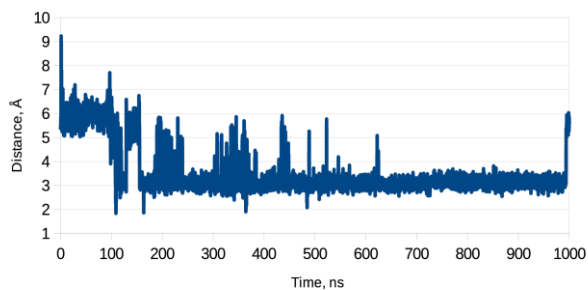

**E**

N at His447 & H2 at N4<sup>+</sup> from LIG 28

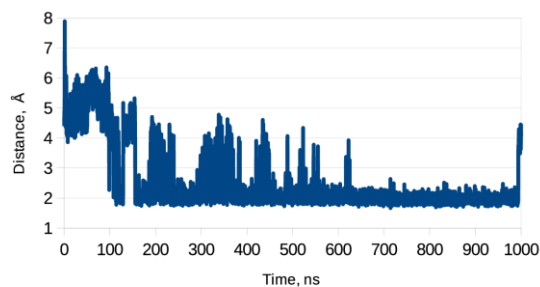

**F**

Tyr337 & N4<sup>+</sup> from LIG 28

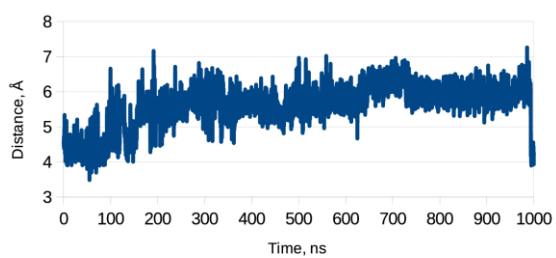

**G**

Trp86 & indole from LIG 28

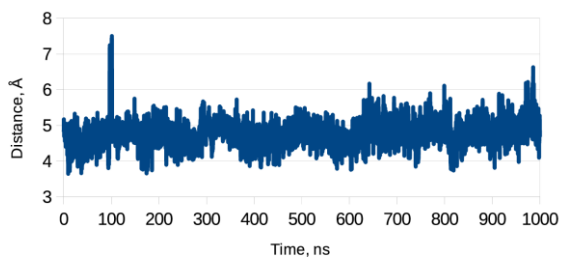

**H**

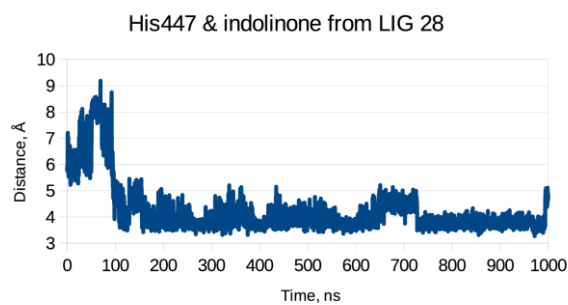

# I

**Figure S4.** Distance plots over the course of simulation for compound **28**. A) between H atom at N-terminal from Gly121 and N atom from indole moiety; B) between the carboxyl group from Glu202 and H atom at NH group from indole moiety; C) between O atom at OH group from Ser203 and H atom at NH group from indolinone; D) between H atom at OH group from Ser203 and O atom at carbonyl group from indolinone; E) between N atom from His447 and H1 atom at quaternary ammonium group; F) between N atom from His447 and H2 atom at quaternary ammonium group; G) between the positively charged N atom and Tyr337; H) between Trp86 and indole part, and I) between His447 and indolinone moiety.

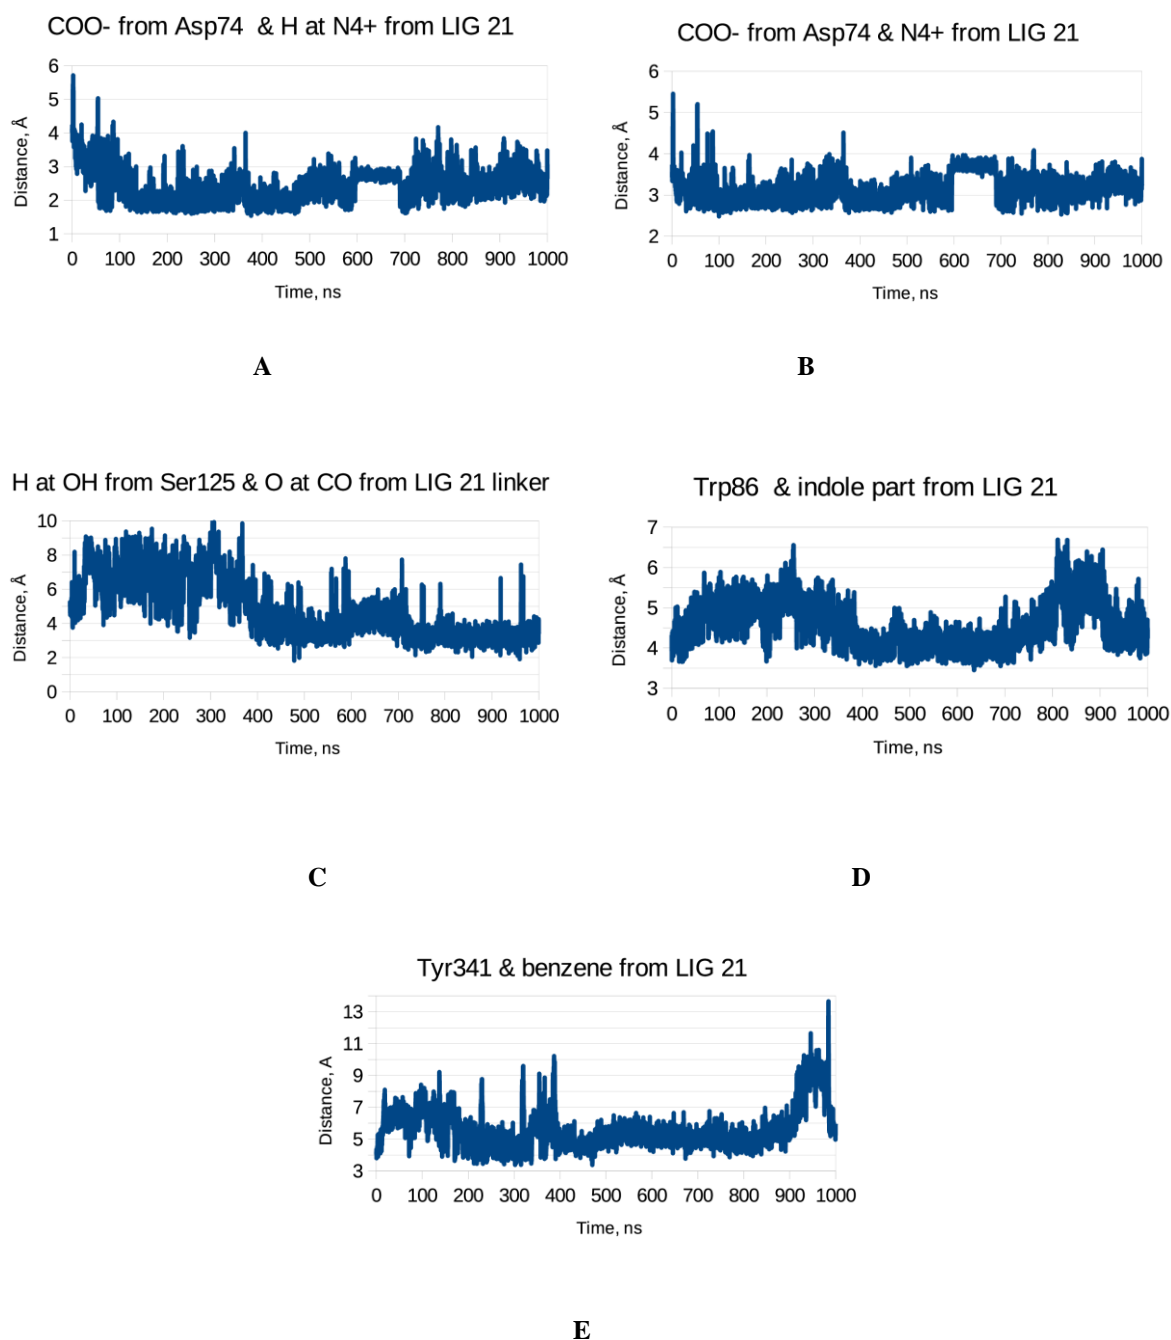

**Figure S5.** Distance plots over the course of simulation for compound **21**. A) between carboxyl group from Asp74 and H atom at quaternary ammonium group; B) between carboxyl group from Asp74 and positively charged N atom; C) between H atom at OH group from Ser125 and O atom at CO group from the linker; D) between indole moieties from Trp86 and **21**; E) between Tyr341 and benzene.

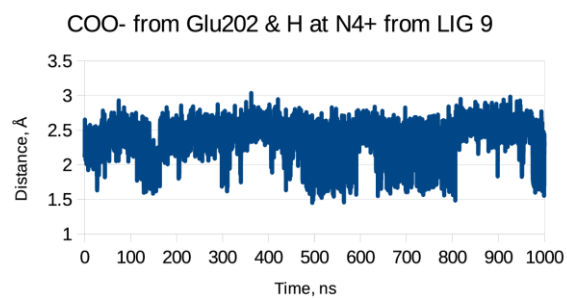

**A**

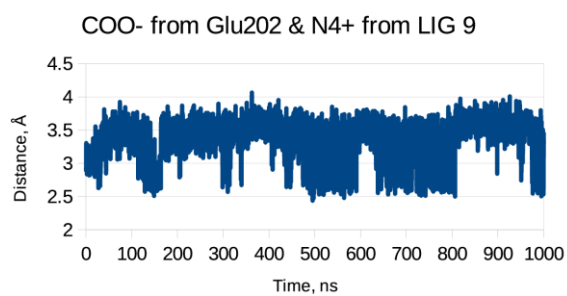

**B**

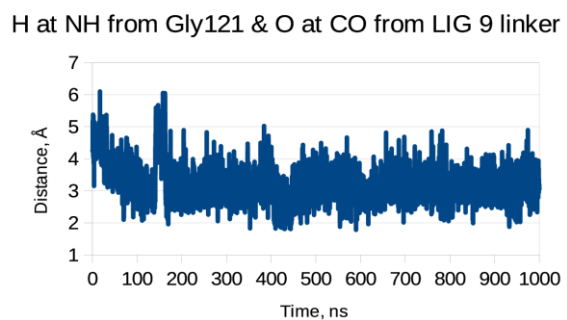

**C**

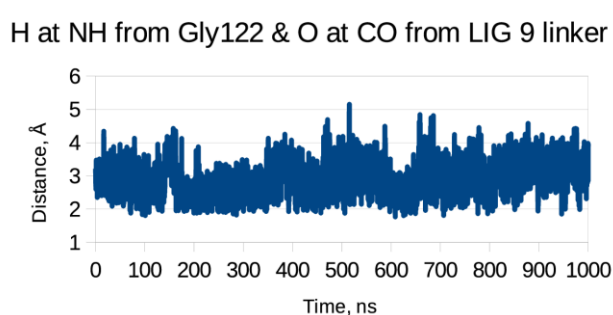

**D**

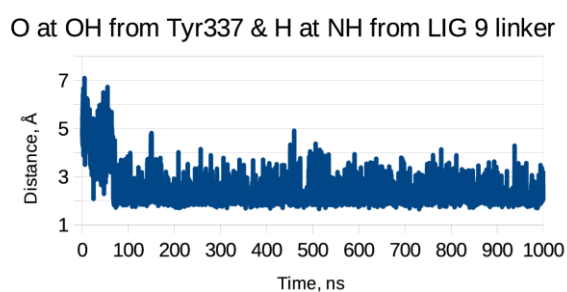

**E**

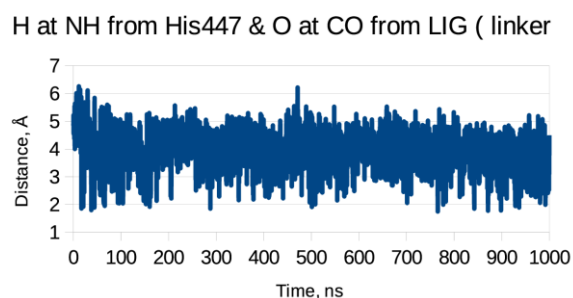

**F**

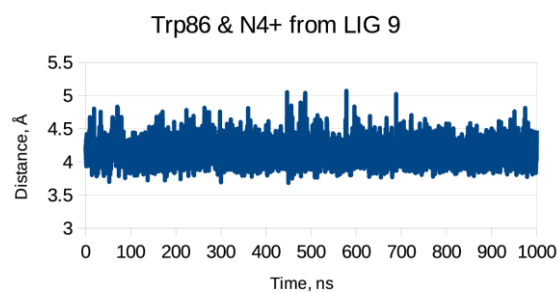

**G**

**Figure S6.** Distance plots over the course of simulation for compound **9**. A) between carboxyl group from Glu202 and H atom at quaternary ammonium group; B) between carboxyl group from Glu202 and positively charged N atom; C) between H atom at N-terminus from Gly121 and O atom at CO group from linker; D) between H atom at N-terminus from Gly122 and O atom at CO group from linker; E) between O atom at CO group from Tyr337 and H atom at amino group from the linker; F) between the H atom at NH from His447 and O atom at the carbonyl group from the linker; G) between indole moiety from Trp86 and cation at quaternary ammonium group.

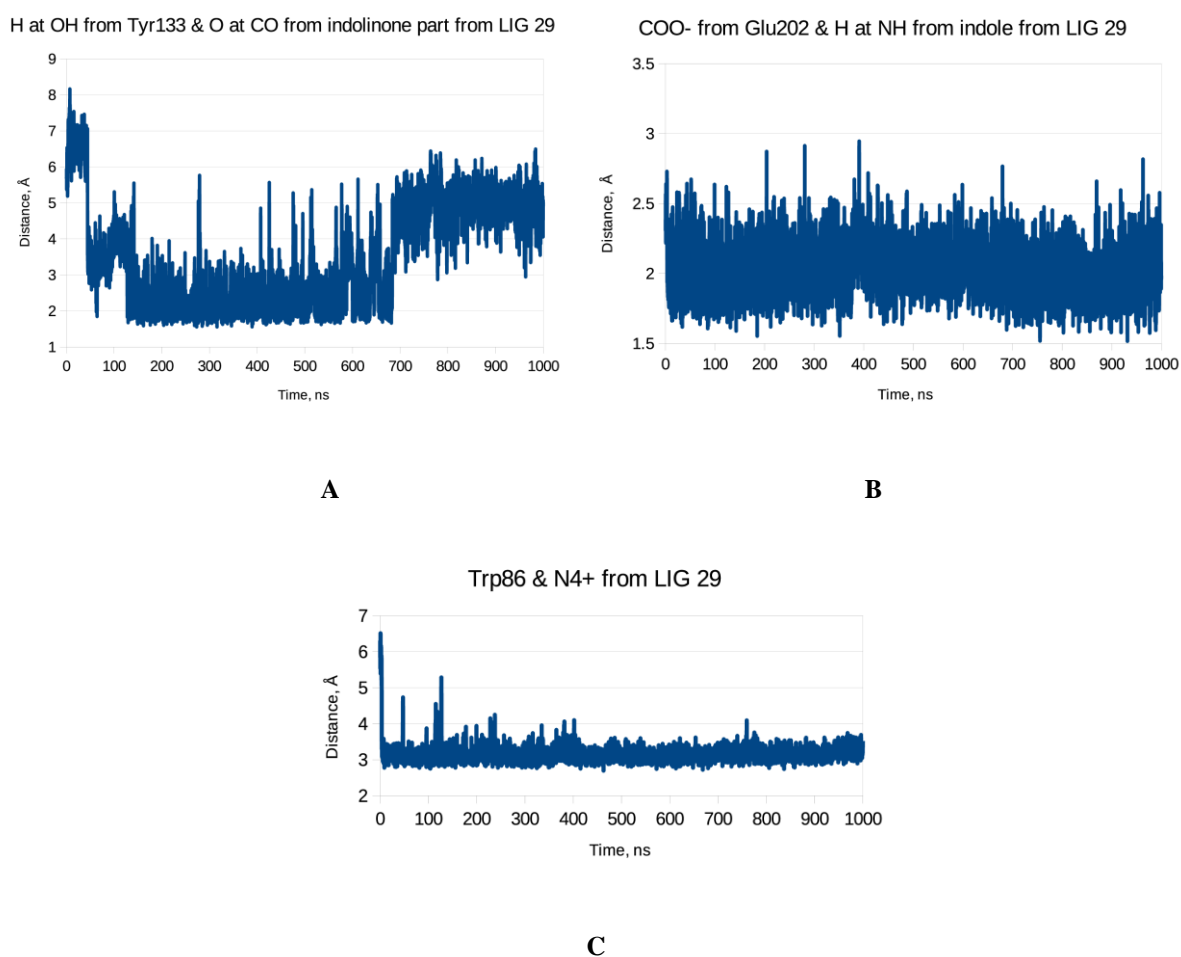

**Figure S7.** Distance plots over the course of simulation for compound **29**. A) between H atom at OH group from Tyr133 and O atom at CO group; B) between COO<sup>-</sup> from Glu202 and H atom at NH group from indole part; C) between the indole moiety of Trp86 and positively charged ammonium atom.

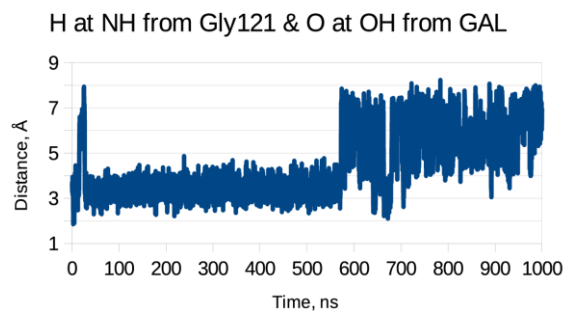

**A**

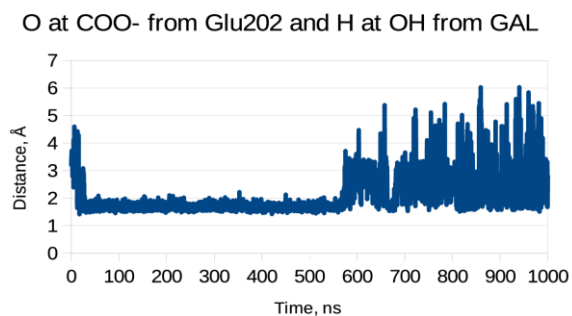

**B**

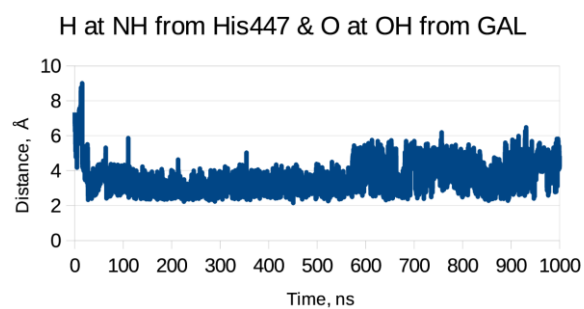

**C**

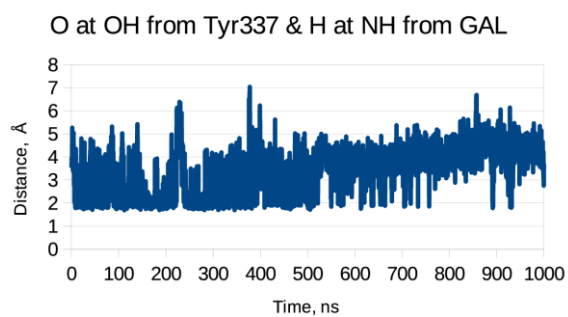

**D**

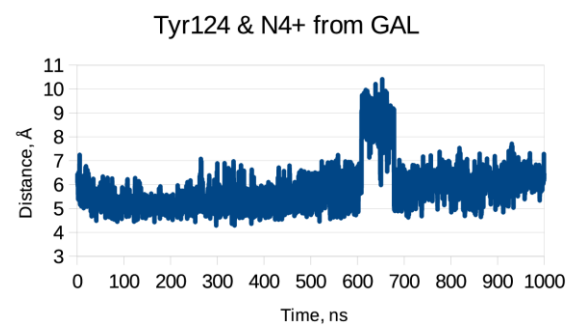

**E**

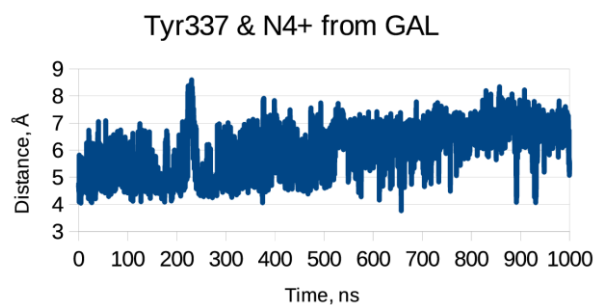

**F**

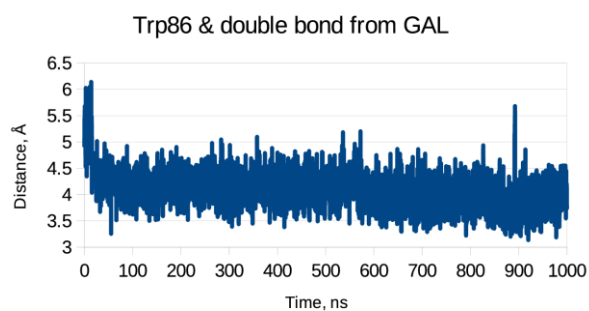

**G**

**Figure S8.** Distance plots over the course of simulation for GAL. A) between H atom at NH group from Gly121 and O atom at OH group; B) between COO<sup>-</sup> from Glu202 and H atom at NH group from indole part; C) between the H atom from His447 and O atom at OH; D) between O atom at OH from Tyr337 and H atom at NH; E) between the benzene of Tyr124 and positively charged ammonium atom; F) between the benzene of Tyr337 and positively charged ammonium atom; G) between the indole moiety of Trp86 and the unsaturated double bond.
